# Supplementary material for: Reference Genes for Expression Analyses by qRT-PCR in Phthorimaea operculella (Lepidoptera: Gelechiidae)
Source: MDPI journal article supplement (doi:10.3390/insects13020140), 2022-01-28
Supplement: s1 [file s1]

**Table S1. The overall threshold cycle (Ct) values under different experimental conditions.**

| Conditions<br>CtGs*   | ACT      | $\alpha$ -TUB | 18S      | 28S      | GAPDH    | EF1 $\alpha$ | RPL4     | RPL13    | RPL27    | SOD      |
|-----------------------|----------|---------------|----------|----------|----------|--------------|----------|----------|----------|----------|
| Developmental stages  | 15.15087 | 20.33377      | 17.16861 | 15.40092 | 17.38231 | 18.50965     | 20.57646 | 19.09625 | 18.50842 | 24.48647 |
|                       | 15.30289 | 20.09002      | 17.3012  | 15.23966 | 17.40605 | 18.46893     | 20.61237 | 19.10226 | 18.18901 | 24.78455 |
|                       | 15.31202 | 20.0841       | 17.71218 | 15.39051 | 17.41345 | 18.36044     | 21.08964 | 19.15487 | 18.54869 | 24.62014 |
|                       | 21.36878 | 18.63741      | 17.24172 | 15.87268 | 15.40442 | 17.66621     | 18.93544 | 18.65678 | 17.46148 | 25.00257 |
|                       | 21.48412 | 18.94039      | 16.99137 | 15.90491 | 15.81388 | 17.68781     | 19.14562 | 18.96695 | 17.5783  | 26.45315 |
|                       | 21.61292 | 18.54665      | 17.18199 | 15.85825 | 15.48453 | 17.87426     | 19.63438 | 18.95512 | 17.6536  | 24.17344 |
|                       | 23.55853 | 18.74717      | 17.09608 | 15.01707 | 18.34377 | 18.35731     | 21.1226  | 19.23779 | 19.12414 | 25.91982 |
|                       | 23.74132 | 19.39036      | 17.1965  | 15.17968 | 17.90554 | 18.41681     | 20.8432  | 19.01916 | 19.97578 | 25.5086  |
|                       | 24.13051 | 19.21931      | 16.96727 | 15.00447 | 17.65397 | 18.59694     | 20.85534 | 19.31716 | 19.41252 | 25.94429 |
|                       | 24.2061  | 19.83245      | 19.8932  | 15.08853 | 16.32456 | 18.03046     | 21.56549 | 18.83839 | 18.21029 | 24.46144 |
|                       | 24.20983 | 19.82515      | 20.19222 | 15.13793 | 16.35854 | 17.87707     | 21.39958 | 18.85353 | 17.95341 | 24.56554 |
|                       | 24.67519 | 19.8523       | 20.31051 | 15.03939 | 16.18793 | 18.11147     | 21.65458 | 18.9698  | 17.98153 | 24.45445 |
| Larvae tissues        | 21.41064 | 19.85981      | 16.07345 | 13.81916 | 16.75419 | 17.03744     | 19.87946 | 17.83532 | 17.98149 | 30.0373  |
|                       | 21.53244 | 19.65627      | 15.81387 | 13.96609 | 16.60983 | 16.93103     | 19.99187 | 17.85547 | 17.84878 | 30.17906 |
|                       | 21.73213 | 19.47741      | 16.54719 | 13.57948 | 16.7511  | 16.90399     | 20.09921 | 18.37256 | 17.73967 | 29.93597 |
|                       | 21.79643 | 18.50743      | 16.6471  | 13.96252 | 15.98161 | 17.10015     | 19.84644 | 17.84991 | 17.36133 | 24.97837 |
|                       | 21.85752 | 18.18722      | 17.4707  | 13.67054 | 17.10892 | 17.13782     | 20.33724 | 18.10657 | 18.55532 | 24.50267 |
|                       | 22.10178 | 19.14225      | 15.17896 | 14.34535 | 19.26302 | 17.25594     | 20.80175 | 18.20087 | 18.24593 | 29.1653  |
|                       | 22.14884 | 18.19736      | 16.81453 | 13.97055 | 16.2025  | 16.77641     | 20.14889 | 18.25978 | 17.98429 | 24.64478 |
|                       | 22.31396 | 19.0691       | 15.31338 | 14.25178 | 19.29265 | 17.20875     | 20.35391 | 18.16135 | 18.79525 | 29.06959 |
|                       | 22.3976  | 18.73846      | 15.87814 | 14.22464 | 18.37025 | 17.38631     | 21.05984 | 19.00373 | 18.66069 | 28.87456 |
|                       | 22.39895 | 19.11584      | 15.40792 | 14.27232 | 19.49422 | 17.1488      | 21.35748 | 18.31537 | 19.41829 | 29.68227 |
|                       | 22.4086  | 18.59349      | 15.54262 | 14.30326 | 17.78681 | 17.29609     | 20.89396 | 19.005   | 18.41718 | 28.69848 |
|                       | 22.43607 | 18.62572      | 15.68894 | 14.2478  | 17.69932 | 17.28296     | 21.08849 | 19.04397 | 18.8933  | 28.42809 |
|                       | 22.77226 | 17.78307      | 14.43568 | 14.76648 | 16.52638 | 17.06837     | 20.4276  | 17.84909 | 17.82487 | 29.04099 |
|                       | 22.8289  | 17.72235      | 14.62044 | 14.88807 | 16.17378 | 16.88747     | 19.932   | 17.78518 | 17.34085 | 28.66541 |
|                       | 22.96449 | 17.96292      | 14.57266 | 14.7814  | 16.66541 | 17.20266     | 20.72603 | 18.04869 | 17.33467 | 28.75112 |
|                       | 23.57818 | 19.42972      | 16.1397  | 13.98654 | 16.21541 | 16.74384     | 21.02248 | 17.99557 | 17.01243 | 24.54971 |
|                       | 23.59295 | 18.64676      | 15.01076 | 13.58709 | 15.51985 | 16.82157     | 20.2374  | 18.18713 | 17.63543 | 25.32356 |
|                       | 23.72076 | 19.37824      | 16.62145 | 14.05392 | 15.913   | 16.50493     | 20.47548 | 17.98661 | 17.0797  | 24.60013 |
|                       | 23.87847 | 19.15899      | 15.71055 | 14.01572 | 16.41601 | 16.60554     | 20.51548 | 18.08569 | 17.2835  | 25.01039 |
|                       | 23.88928 | 18.54342      | 14.90475 | 13.34675 | 15.65294 | 16.78447     | 19.79489 | 18.41511 | 17.8376  | 25.62803 |
|                       | 23.96067 | 18.78806      | 14.96591 | 13.43983 | 15.25042 | 17.04814     | 20.39293 | 18.28329 | 17.02606 | 25.29828 |
| Temperature treatment | 21.74472 | 18.3006       | 15.89296 | 14.566   | 16.0305  | 16.219       | 18.489   | 17.451   | 17.049   | 28.70632 |
|                       | 21.78199 | 18.50234      | 15.72709 | 14.459   | 16.16311 | 16.080       | 18.344   | 17.533   | 16.686   | 28.67042 |
|                       | 21.85881 | 18.18163      | 16.28361 | 13.898   | 16.53065 | 15.603       | 18.024   | 17.431   | 18.266   | 29.620   |
|                       | 21.87711 | 18.32175      | 15.72119 | 14.598   | 16.12239 | 16.186       | 18.752   | 17.500   | 16.914   | 29.1929  |
|                       | 22.00956 | 18.74751      | 14.46755 | 14.482   | 16.19503 | 16.874       | 21.045   | 17.770   | 17.980   | 30.5146  |
|                       | 22.15675 | 18.71495      | 14.48961 | 14.479   | 16.73127 | 16.048       | 20.687   | 17.356   | 17.182   | 29.87407 |
|                       | 22.29359 | 18.75954      | 14.25513 | 14.506   | 16.1531  | 16.013       | 20.559   | 17.787   | 17.201   | 30.25628 |
|                       | 22.37567 | 19.09118      | 15.72933 | 13.584   | 16.62312 | 15.837       | 18.268   | 17.171   | 17.926   | 30.124   |
|                       | 22.52571 | 18.17198      | 15.97678 | 13.930   | 17.19316 | 15.414       | 18.248   | 17.456   | 17.839   | 30.585   |

|          |          |          |        |          |        |        |        |        |          |
|----------|----------|----------|--------|----------|--------|--------|--------|--------|----------|
| 22.56231 | 18.64645 | 15.11902 | 14.769 | 17.24114 | 17.463 | 19.661 | 18.215 | 17.686 | 24.99375 |
| 22.67279 | 18.72953 | 15.48826 | 14.984 | 17.34208 | 17.427 | 19.979 | 18.053 | 17.728 | 25.37918 |
| 22.73264 | 18.297   | 15.17468 | 14.815 | 16.70056 | 16.928 | 19.612 | 18.180 | 17.628 | 25.42645 |
| 23.06645 | 17.77577 | 14.05952 | 14.442 | 17.28865 | 16.993 | 19.429 | 17.883 | 18.711 | 27.77227 |
| 23.2654  | 19.50208 | 14.72528 | 13.792 | 20.58568 | 16.741 | 19.607 | 18.264 | 17.980 | 26.97127 |
| 23.46457 | 18.09946 | 13.82993 | 14.034 | 16.93091 | 16.471 | 19.955 | 18.364 | 18.623 | 28.08049 |
| 23.61879 | 19.07186 | 14.53969 | 13.825 | 20.10557 | 16.790 | 19.271 | 17.994 | 18.077 | 26.79676 |
| 23.7222  | 18.15919 | 14.23979 | 14.095 | 17.10019 | 17.009 | 19.772 | 18.202 | 18.400 | 28.25869 |
| 24.21464 | 19.22025 | 14.64372 | 13.666 | 20.20391 | 16.886 | 19.556 | 18.132 | 17.646 | 26.9196  |
| 24.61296 | 20.03484 | 15.65906 | 15.210 | 19.05597 | 18.275 | 21.267 | 19.035 | 19.981 | 28.37941 |
| 24.62598 | 20.13625 | 15.68995 | 15.149 | 19.19447 | 18.231 | 21.387 | 19.104 | 19.290 | 28.07682 |
| 24.77825 | 19.95197 | 15.68042 | 15.146 | 19.20584 | 17.748 | 21.560 | 19.147 | 19.575 | 28.09458 |
| 25.71525 | 19.77539 | 14.95142 | 14.569 | 19.4011  | 18.448 | 21.173 | 19.809 | 20.073 | 27.34994 |
| 25.76457 | 19.71999 | 14.97772 | 14.560 | 19.68906 | 18.785 | 21.186 | 19.770 | 20.308 | 27.36473 |
| 25.78468 | 19.78948 | 17.75482 | 14.711 | 20.5836  | 18.706 | 21.356 | 20.793 | 19.695 | 33.26899 |
| 25.83033 | 19.59586 | 15.06826 | 14.781 | 19.98199 | 18.979 | 21.048 | 19.447 | 19.945 | 27.3571  |
| 25.91783 | 19.765   | 17.3434  | 15.194 | 20.40183 | 18.859 | 21.194 | 20.560 | 19.991 | 33.64865 |
| 25.94387 | 19.76303 | 16.64415 | 14.762 | 20.71656 | 18.539 | 21.156 | 21.058 | 19.745 | 33.74284 |

\*Candidate reference genes
